# Supplementary material for: Recent spatial aggregation tendency of rainfall extremes over India
Source: PubMed Central journal article supplement (PMC6635486; doi:10.1038/s41598-019-46719-2), 2019-07-16
Supplement: 41598_2019_46719_MOESM1_ESM.pdf [file 41598_2019_46719_MOESM1_ESM.pdf]

# **Supplementary Information for "Recent spatial aggregation tendency of rainfall extremes over India"**

Akshaya C. Nikumbh<sup>1,2</sup>, Arindam Chakraborty<sup>1,2\*</sup> & G. S. Bhat<sup>1,2</sup>

<sup>1</sup>*Centre for Atmospheric and Oceanic Sciences, Indian Institute of Science, Bangalore, 560012, India.*

<sup>2</sup>*Divecha Center for Climate Change, Indian Institute of Science, Bangalore, 560012, India.*

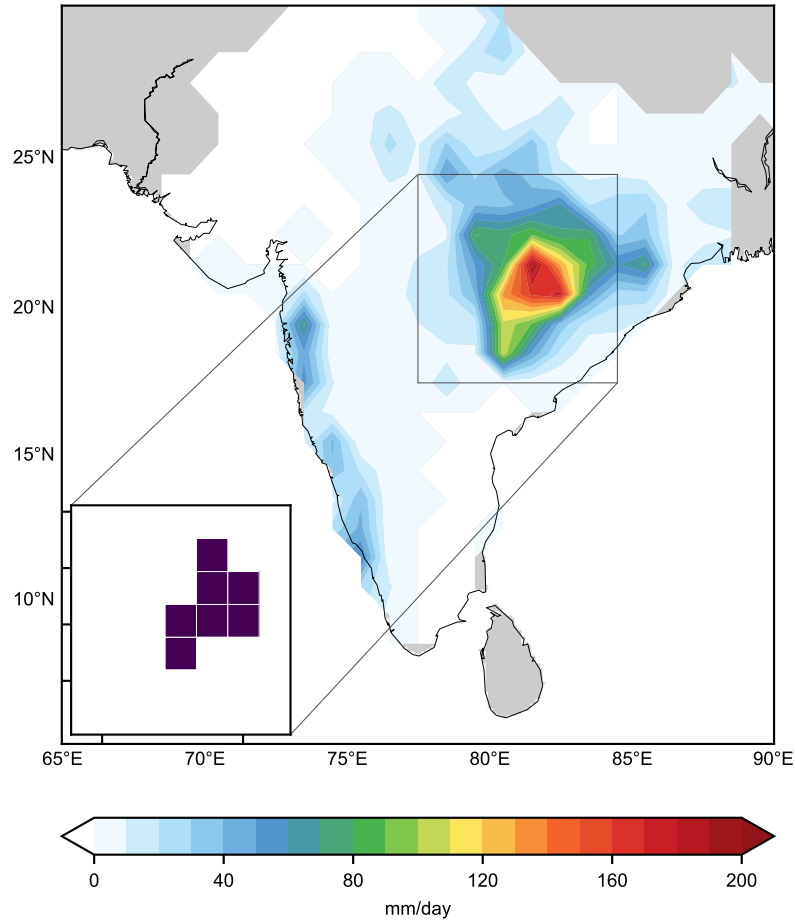

**Supplementary Fig. 1.** An example of the extreme rainfall event that occurred on 22 July 2014, covers seven  $1^\circ \times 1^\circ$  grids. In this study, it is identified as a single event of the size 7 (shown in the inset box) rather than 7 different events by the method used in the past studies. This event contributed 7 and 1 to  $N_T$  and  $N_E$ , respectively.

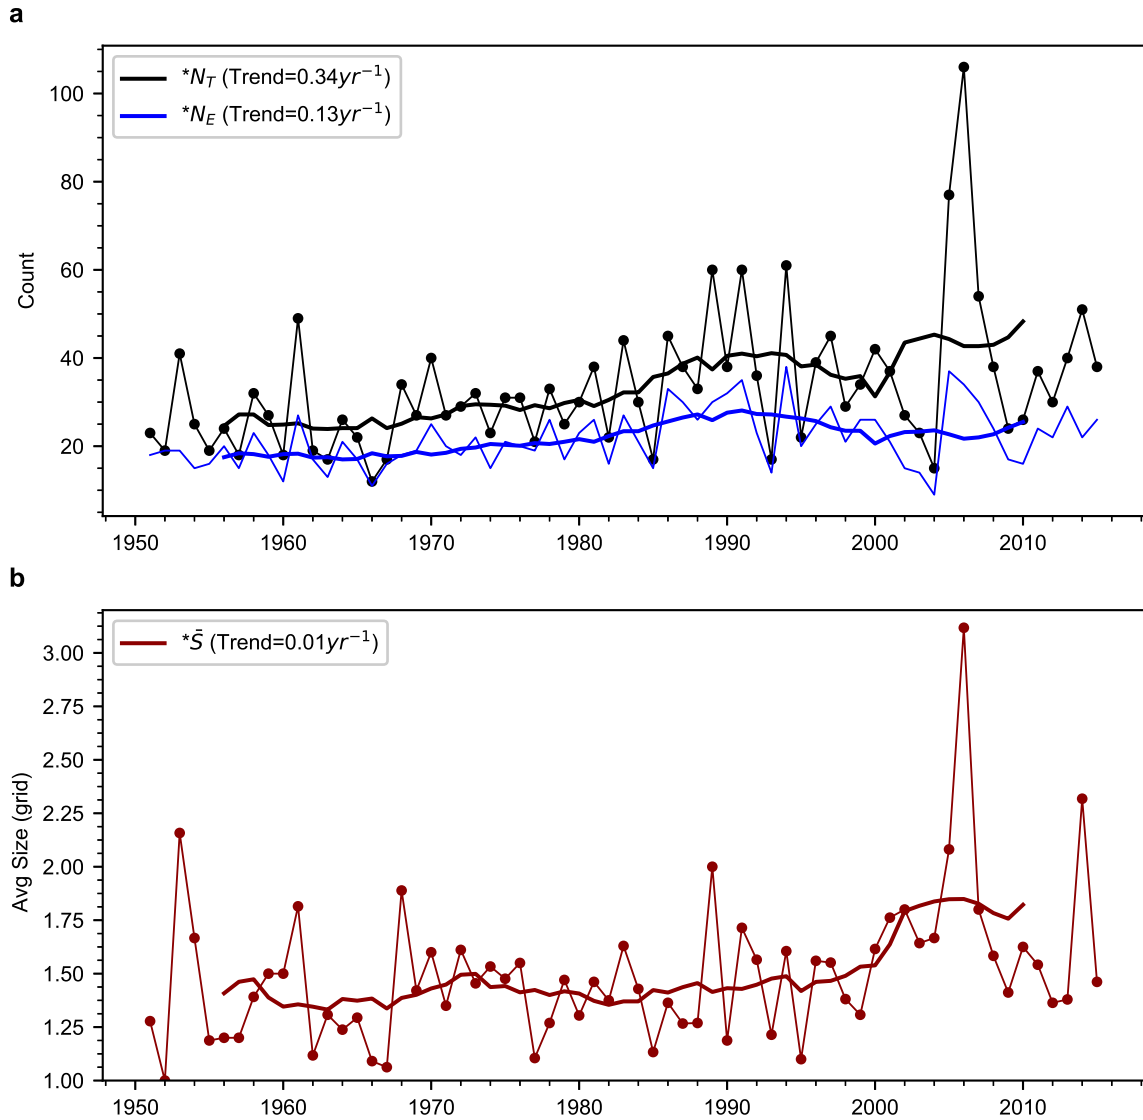

**Supplementary Fig. 2.** Time series of **a.** the total number of  $1^\circ \times 1^\circ$  grids with extreme rainfall ( $N_T$ ), the number of extreme rainfall events ( $N_E$ ), and their **b.** average size ( $\bar{S}$ ) over Central India. The smoothed curves on the time series plots represent 11-year moving averages. Asterisks(\*) indicate the increasing trends are significant at the 99% confidence level using the Mann-Kendall test.

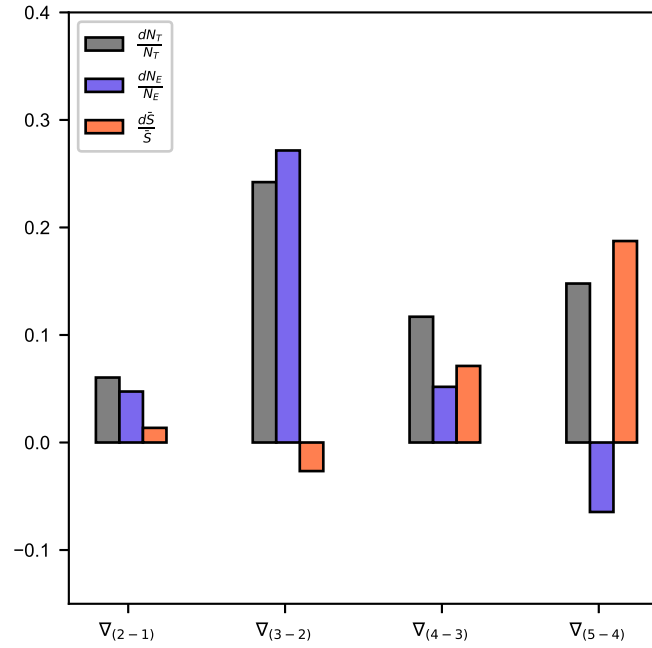

**Supplementary Fig. 3.** The contribution by fractional changes in the average size ( $\frac{d\bar{S}}{\bar{S}}$ ) and the count ( $\frac{dN_E}{N_E}$ ) to the total number of  $1^\circ \times 1^\circ$  grids with extreme rainfall ( $\frac{dN_T}{N_T}$ ) for different sets ( $m$ ) of years (Sets: 1951-1964, 1964-1977, 1977-1990, 1990-2003, 2003-2015).  $\nabla_{(m+1-m)}$  indicates fractional changes calculated from consecutive sets ( $m+1, m$ ) (See method section for details).

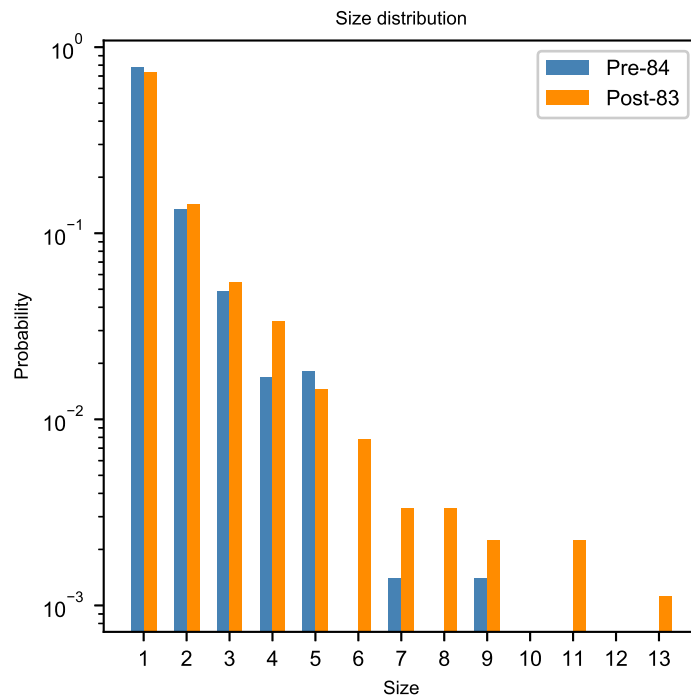

**Supplementary Fig. 4.** Normalized size distribution of extreme rainfall events during the pre-84 (1952-1983) and post-83 (1984-2015) periods.

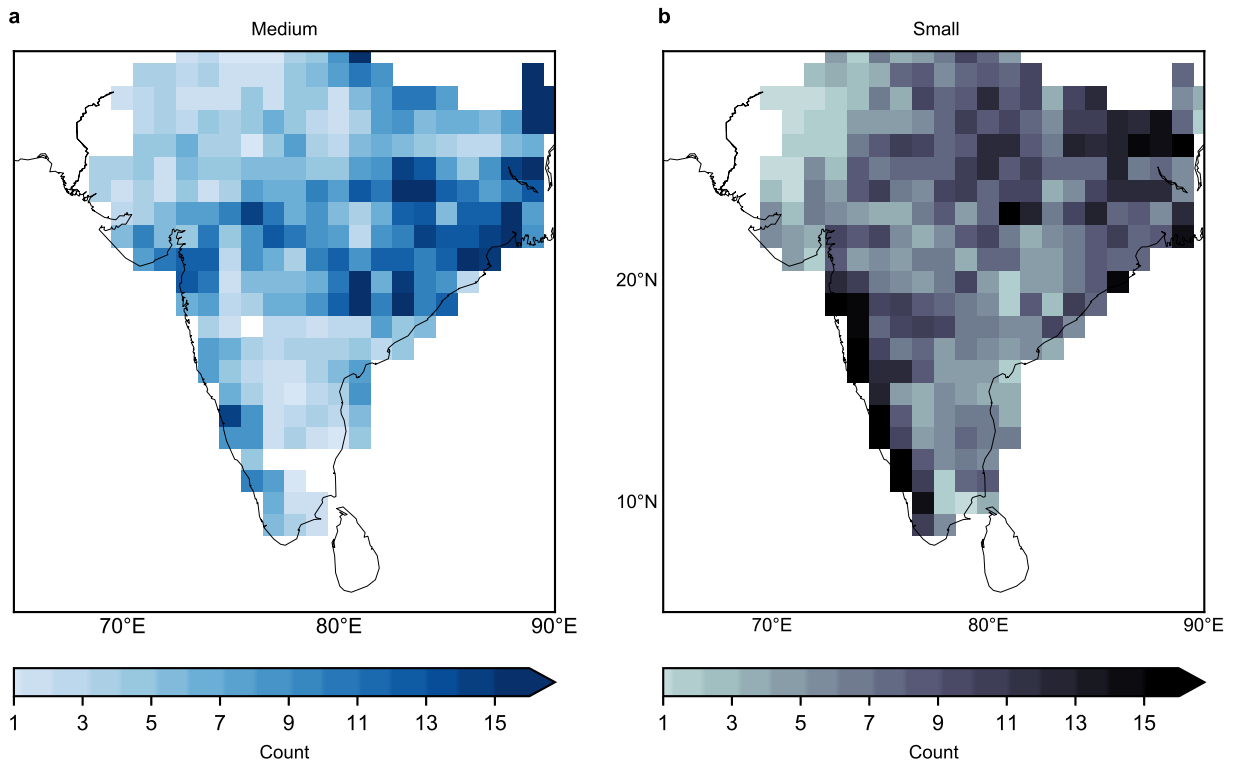

**Supplementary Fig. 5.** Spatial distribution of **a.** medium and **b.** small extreme rainfall events

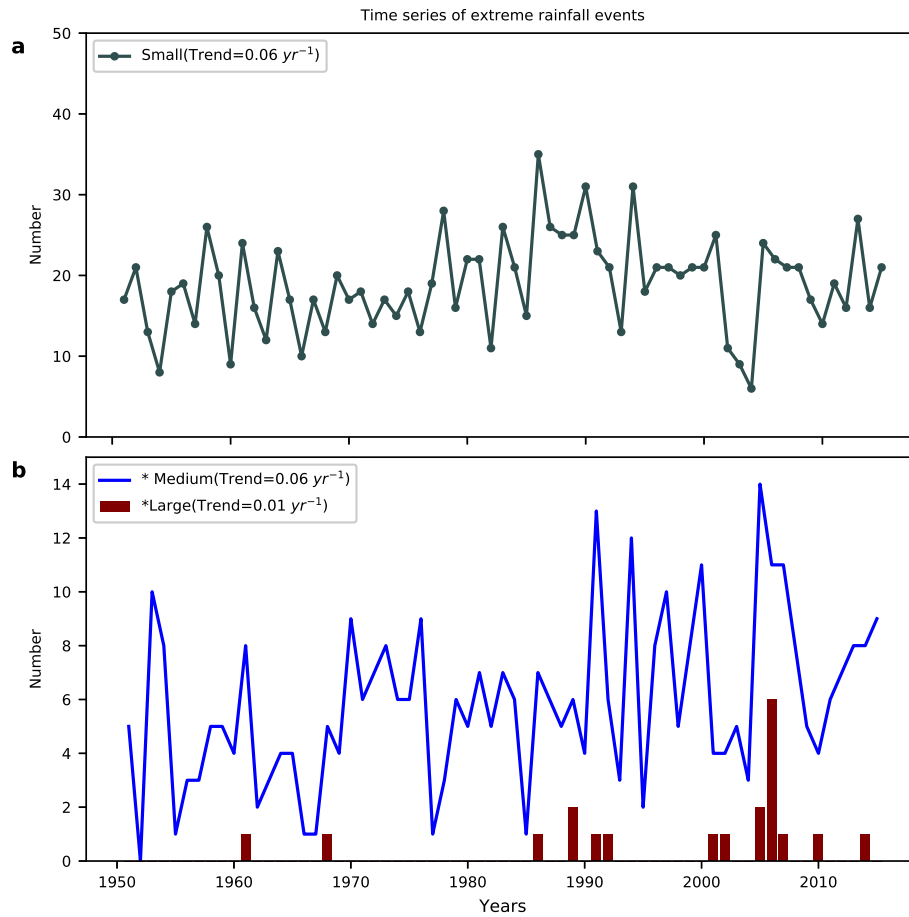

**Supplementary Fig. 6.** Time series of small, medium and large extreme rainfall events. Asterisks(\*) indicate the increasing trends are significant at the 95% confidence level using the Mann-Kendall test.

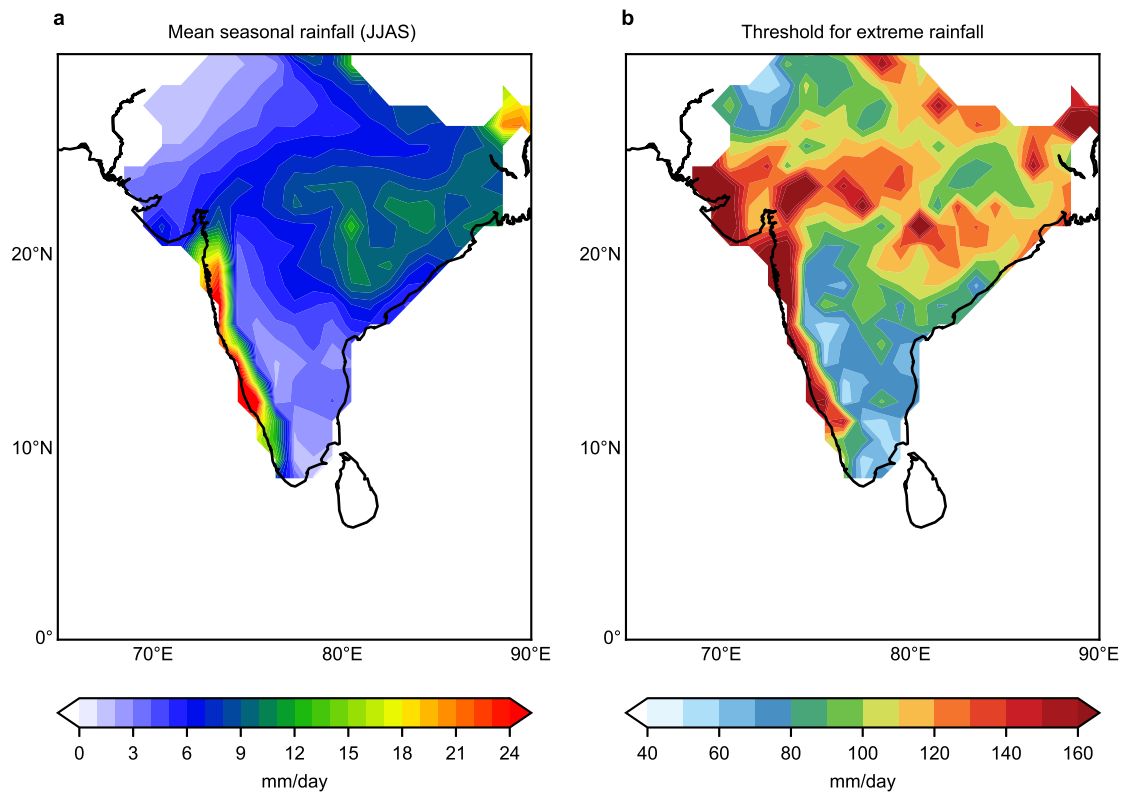

**Supplementary Fig. 7. a.** Climatology of daily rainfall during the Indian summer monsoon **b.** 99.5<sup>th</sup> percentile threshold. Both are obtained using JJAS rainfall data for the period 1951-2015.



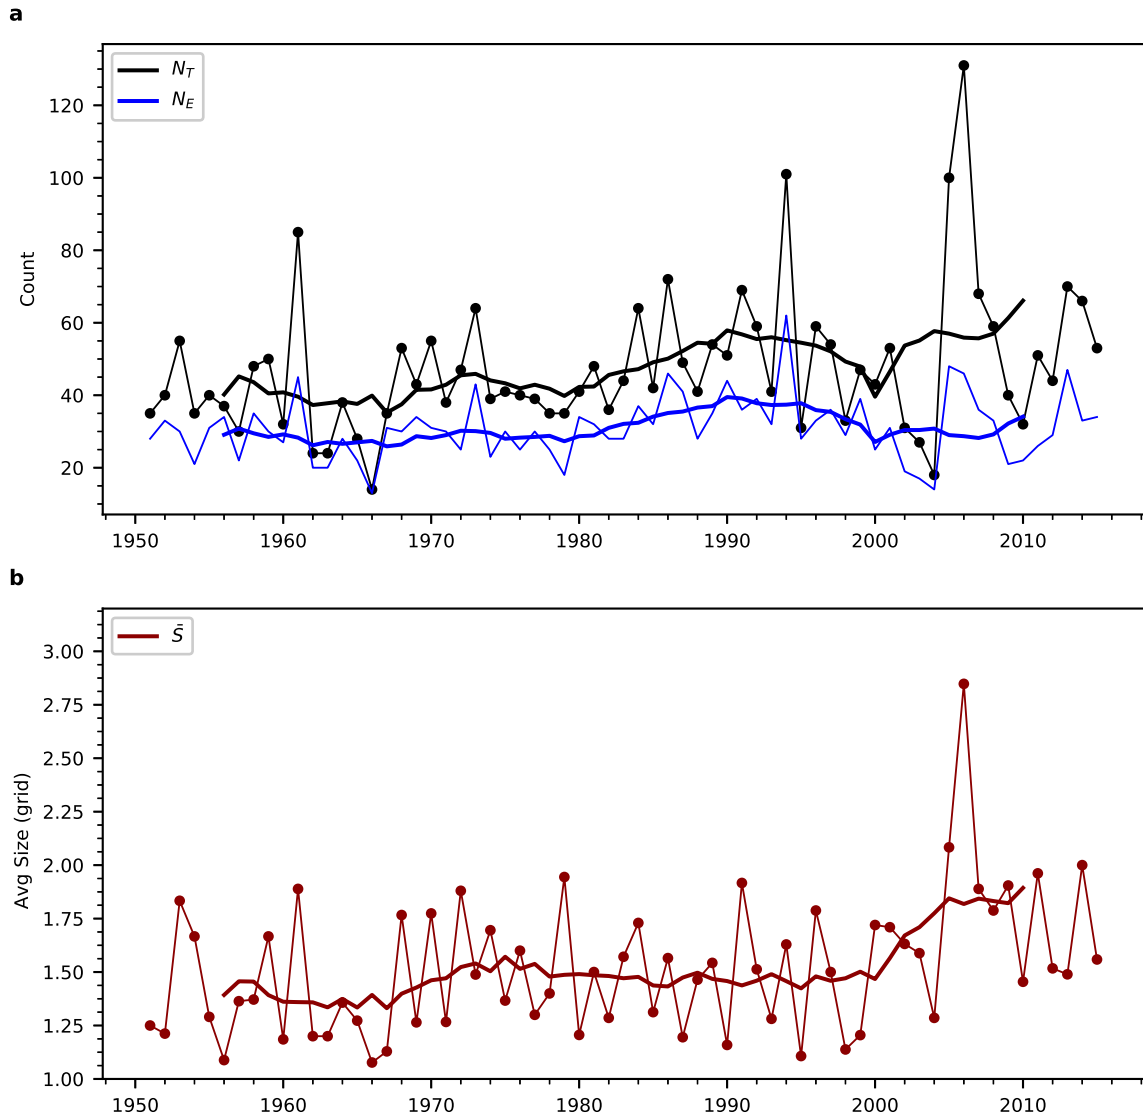

**Supplementary Fig. 8.** Same as Supplementary Fig. 2. but for a fixed threshold of 100 mm day<sup>-1</sup>.

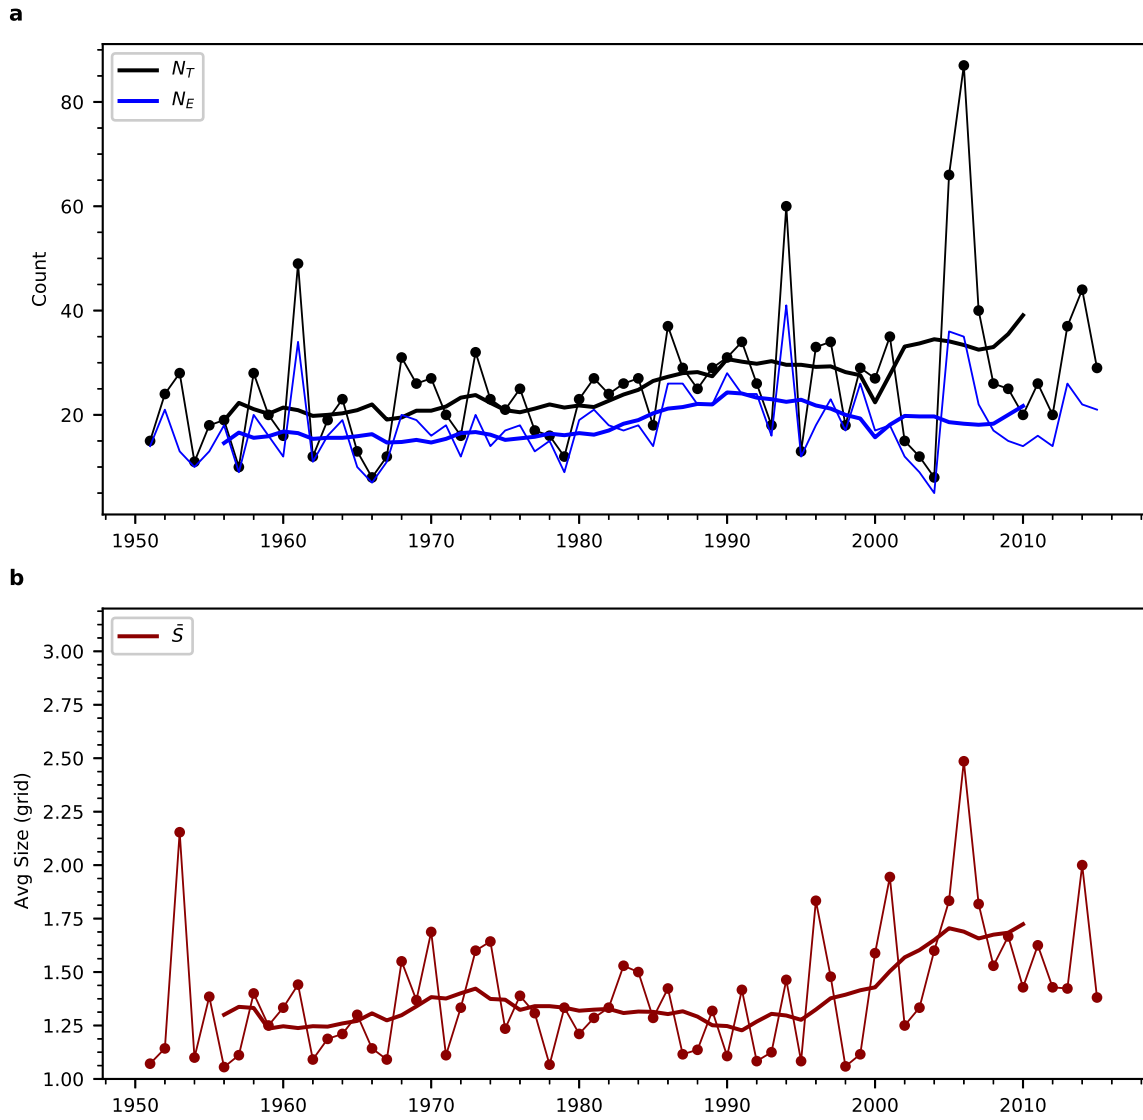

**Supplementary Fig. 9.** Same as Supplementary Fig. 2. but for a fixed threshold of 120 mm day<sup>-1</sup>.

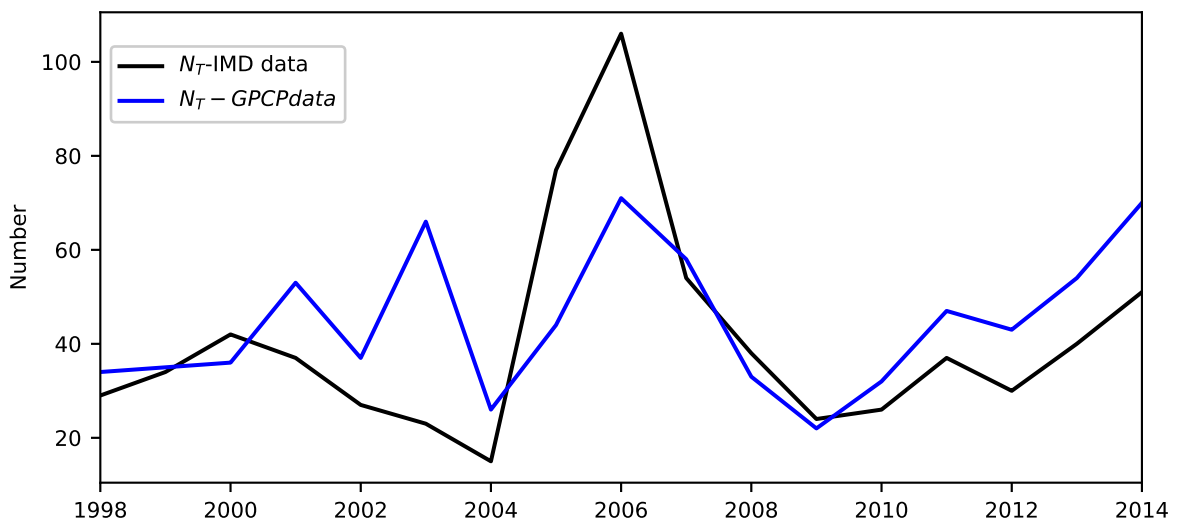

**Supplementary Fig. 10.** Time series of  $N_T$  using the GPCP 1DD v1.2 dataset and the IMD dataset.

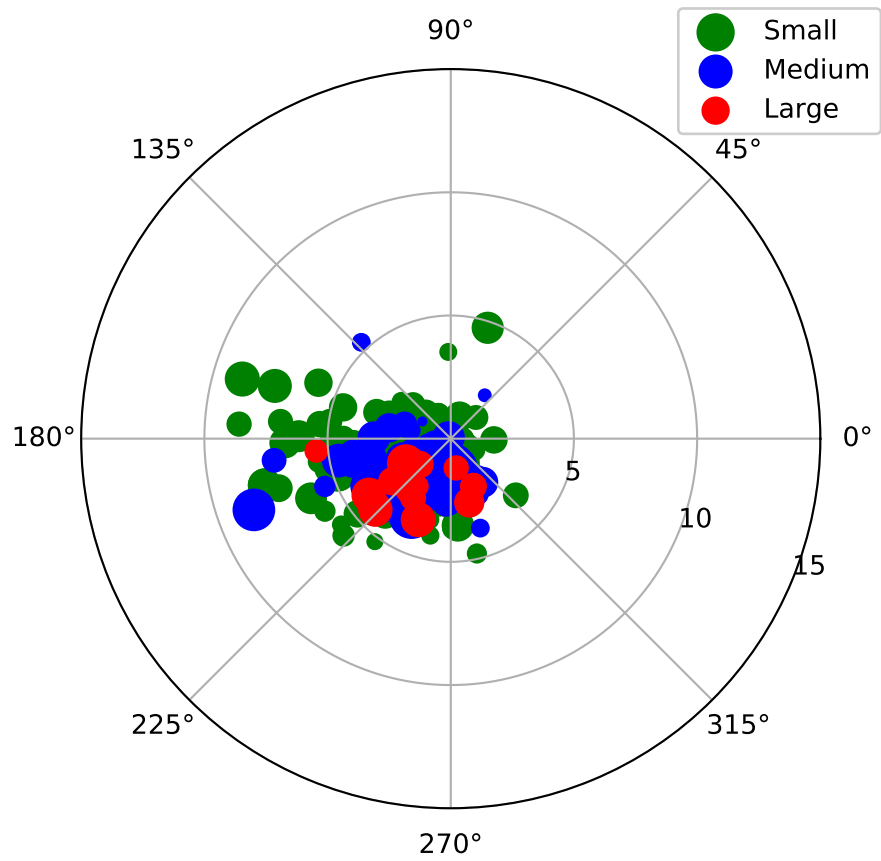

**Supplementary Fig. 11.** The relative locations of Small, medium and large EREs relative to the Monsoon depression.
